# Supplementary material
Source: Springer Nature journal article supplement (https://www.springermedizin.de/resource/supplementary/12957_2012_1023_MOESM1_ESM.pdf/9561650)

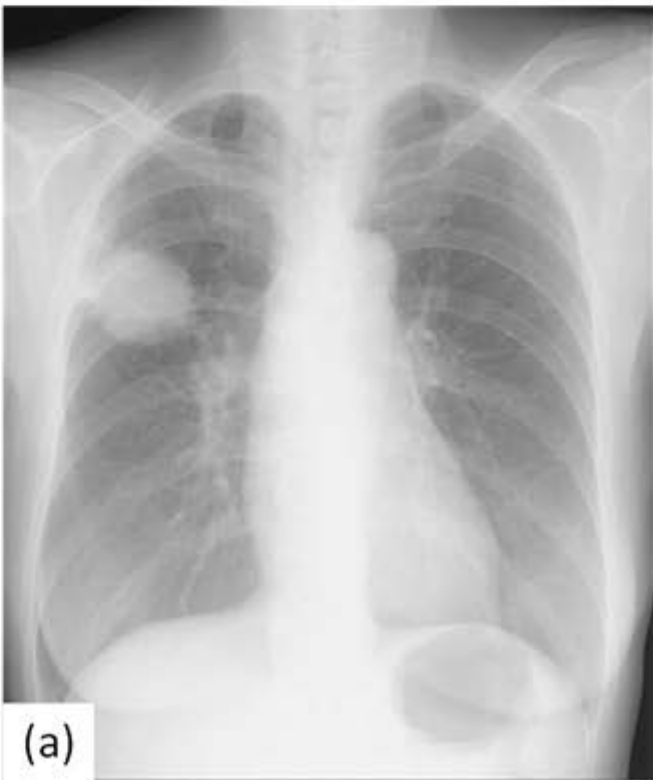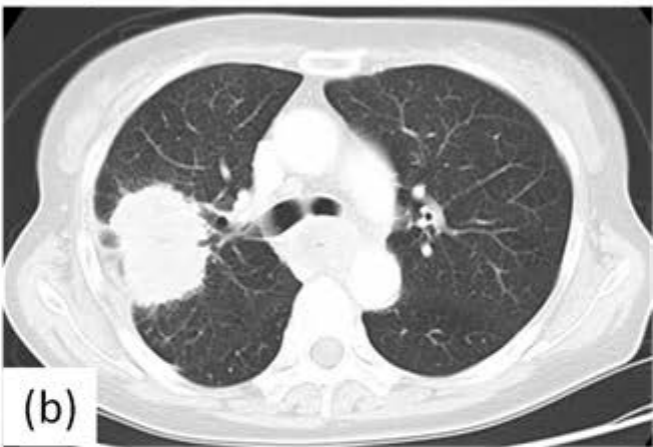

Supplement: MOESM1 [file 9561650]
